# Supplementary material for: Selective ring-opening metathesis polymerization (ROMP) of cyclobutenes. Unsymmetrical ladderphane containing polycyclobutene and polynorbornene strands
Source: publisher site journal article supplement (doi:10.3762/bjoc.15.4), 2019-01-03
Supplement: Additional file 1 [file 1860-5397-15-4-S1.pdf]

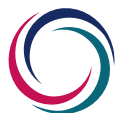

## Supporting Information

for

### **Selective ring-opening metathesis polymerization (ROMP) of cyclobutenes. Unsymmetrical ladderphane containing polycyclobutene and polynorbornene strands**

Yuan-Zhen Ke, Shou-Ling Huang, Guoqiao Lai and Tien-Yau Luh

*Beilstein J. Org. Chem.* **2019**, *15*, 44–51. doi:10.3762/bjoc.15.4

**$^1\text{H}$  and  $^{13}\text{C}$  NMR spectra of both monomers and polymers, as well as GPC and kinetic investigation results**

**Figure S1:** (a) Monomer conversion vs. time for **4** (solid square) and **5** (open circle) (0 °C, DCM-*d*<sub>2</sub>); (b) First-order decay of **4** (solid square) and **5** (open circle) (0 °C, DCM-*d*<sub>2</sub>).

**Figure S2:** (a) Monomer conversion vs. time for **4** (solid square) and **5** (open circle) (0 °C, THF-*d*<sub>8</sub>); Right: Second-order decay of **4** (solid square) (0 °C, THF-*d*<sub>8</sub>).

**Figure S3:** (a) <sup>1</sup>H (400 MHz) and (b) <sup>13</sup>C (100 MHz) NMR spectra of **9**..

**Figure S4:** (a) <sup>1</sup>H (400 MHz) and (b) <sup>13</sup>C (100 MHz) NMR spectra of **14**.

**Figure S5:** (a) <sup>1</sup>H (400 MHz) and (b) <sup>13</sup>C (100 MHz) NMR spectra of **8**.

**Figure S6:** (a) <sup>1</sup>H (400 MHz) and (b) <sup>13</sup>C (100 MHz) NMR spectra of **7**.

**Figure S7:** <sup>1</sup>H (400 MHz) and (b) <sup>13</sup>C (100 MHz) spectra of **19**.

**Figure S8:** Kinetics of the **6**-catalyzed reaction of **4** in CD<sub>2</sub>Cl<sub>2</sub> at 10 °C The reaction was monitored by the decrease of the peak intensity for H-2 using the peaks for H-1 and H-1' as the internal reference. The spectra were recorded every ten minutes.

**Figure S9:** Kinetics of the **6**-catalyzed reaction of **5** in CD<sub>2</sub>Cl<sub>2</sub> at 10 °C The reaction was monitored by the decrease of the peak intensity for H-2 using the peaks for H-1 and H-1' as the internal reference. The spectra were recorded every ten minutes.

**Figure S10:** Kinetics of the **6**-catalyzed reaction of **4** in THF at 0 °C The reaction was monitored by the decrease of the peak intensity for H-2 using the peaks for H-1 and H-1' as the internal reference. The spectra were recorded every twenty minutes.

(a)

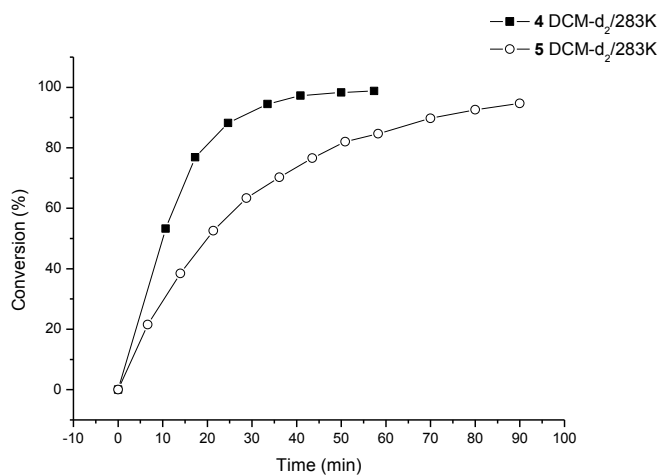

(b)

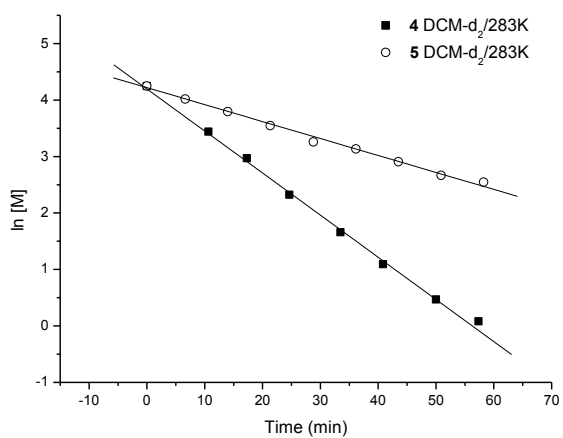

**Figure S1:** (a) Monomer conversion vs time for **4** (solid square) and **5** (open circle) (0 °C, DCM- $d_2$ ); (b) First-order decay of **4** (solid square) and **5** (open circle) (0 °C, DCM- $d_2$ ).

(a)

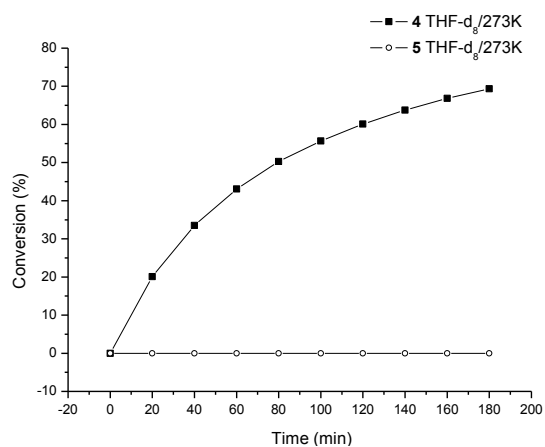

(b)

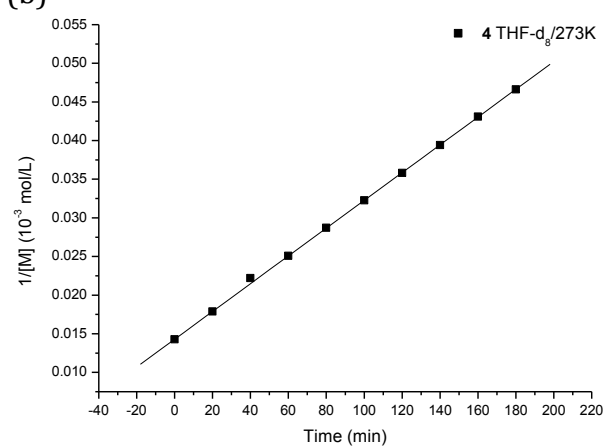

**Figure S2:** (a) Monomer conversion vs time for **4** (solid square) and **5** (open circle) (0 °C, THF- $d_8$ ); (b) Second-order decay of **4** (solid square) (0 °C, THF- $d_8$ ).

(a)

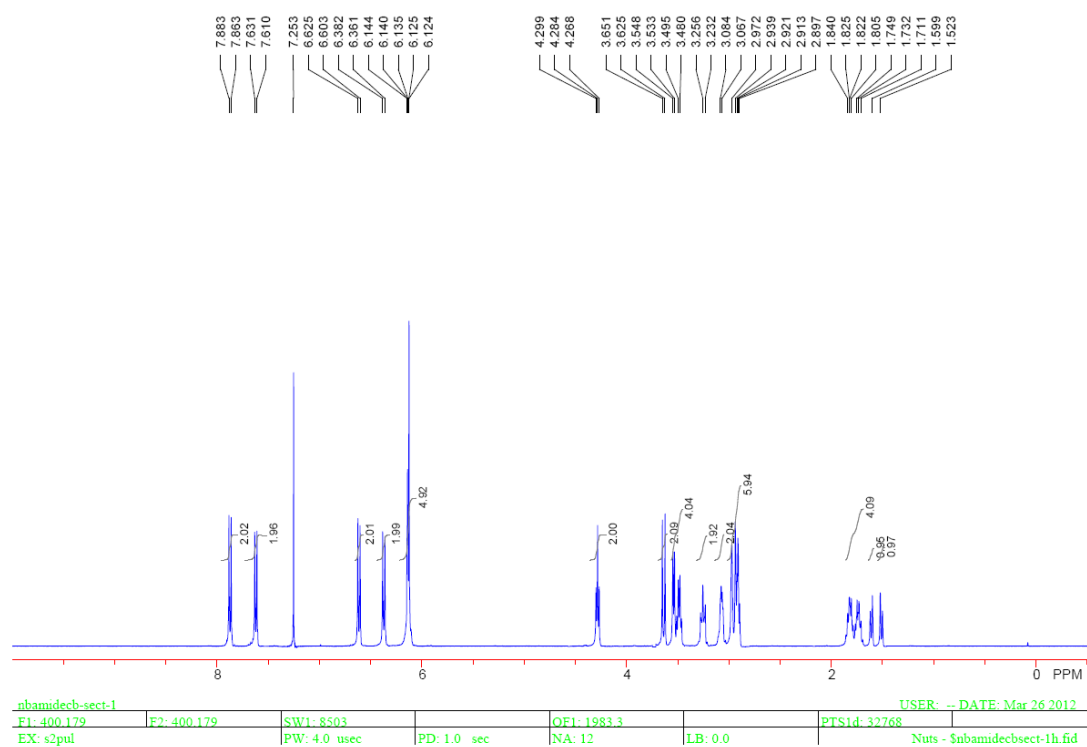

(b)

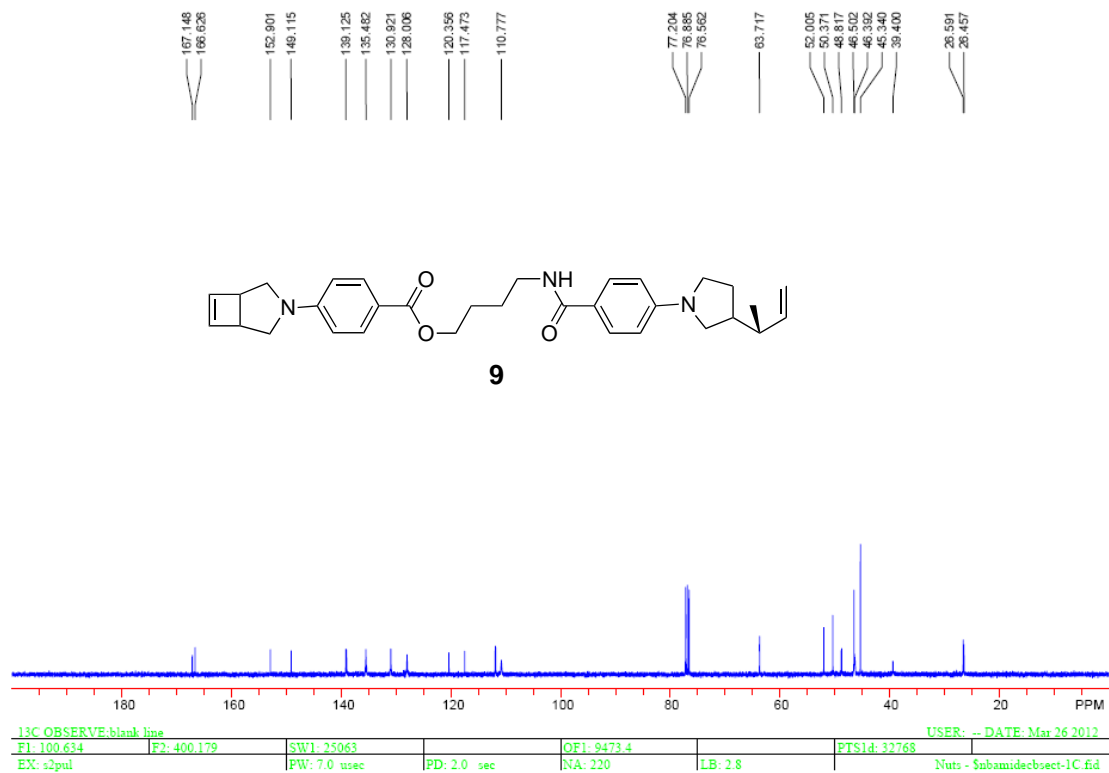

**Figure S3:** (a)  $^1\text{H}$  (400 MHz) and (b)  $^{13}\text{C}$  NMR (100 MHz) spectra of **9**.

(a)

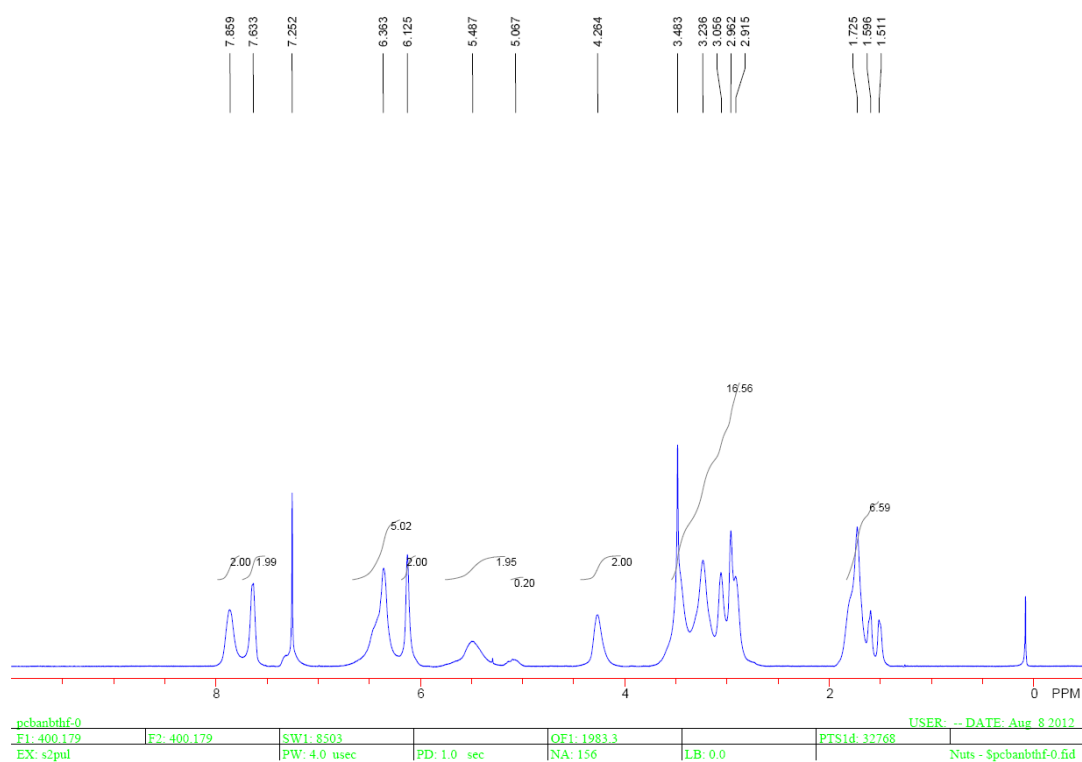

(b)

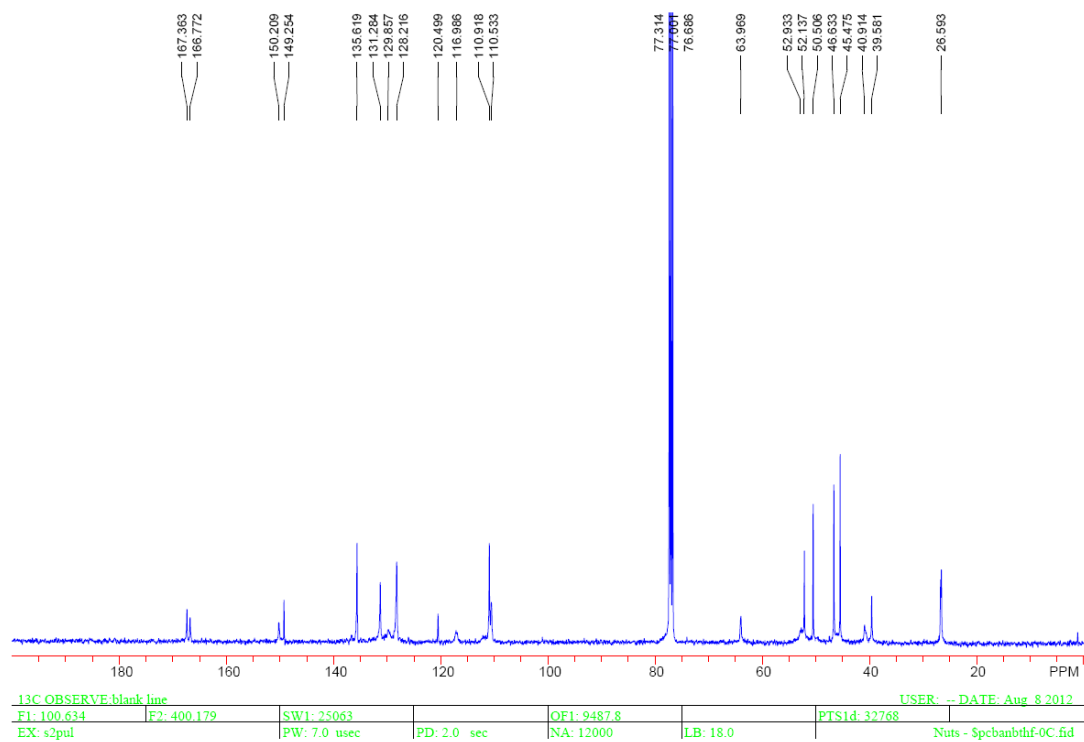

**Figure S4:** (a)  $^1\text{H}$  (400 MHz) and (b)  $^{13}\text{C}$  (100 MHz) NMR spectra of **14**.

(a)

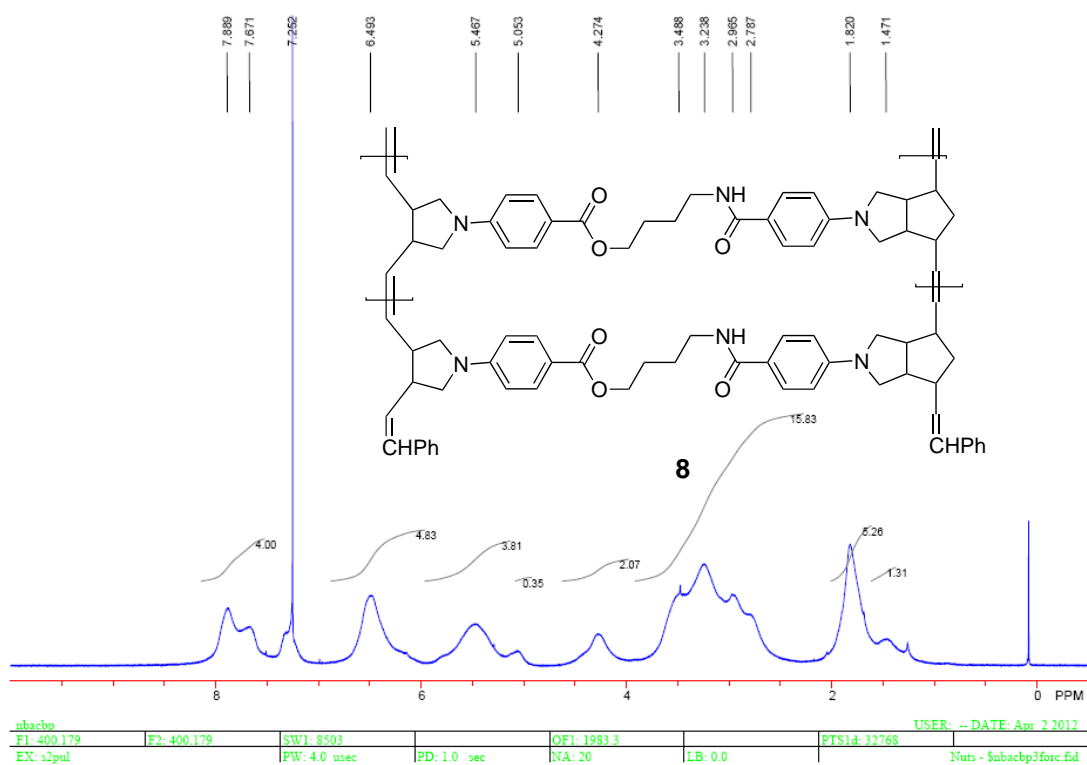

(b)

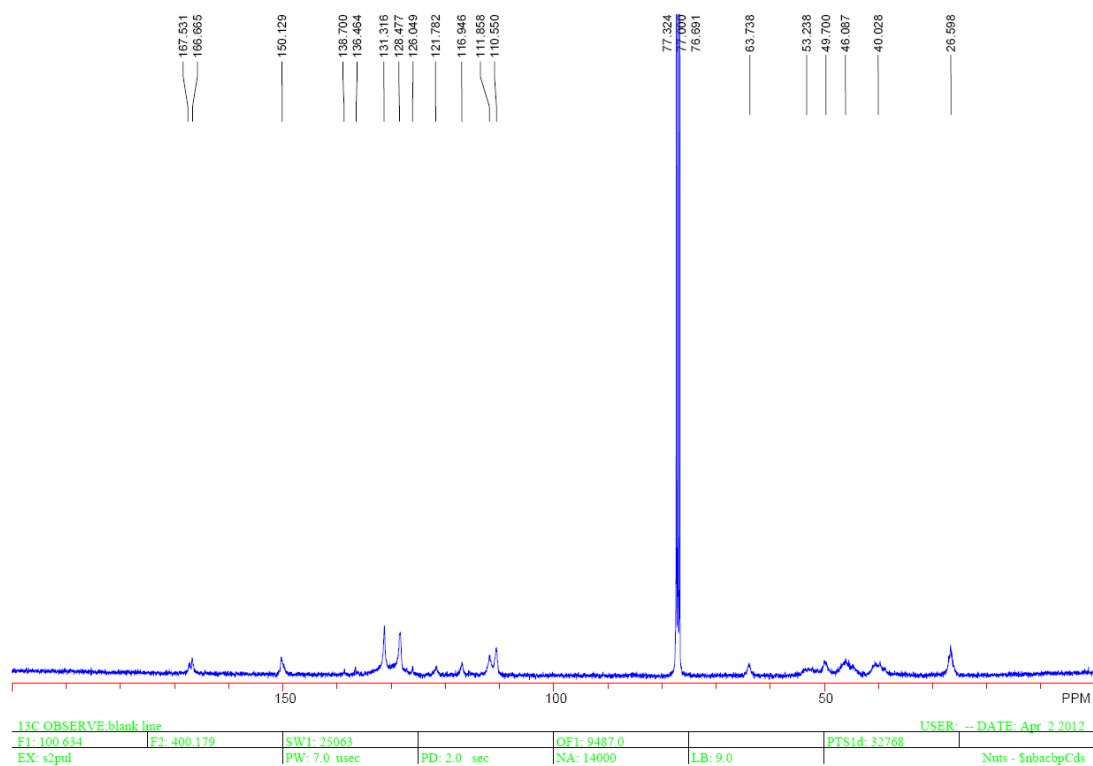

**Figure S5:** (a) <sup>1</sup>H (400 MHz) and (b) <sup>13</sup>C (100 MHz) NMR spectra of **8**.

(a)

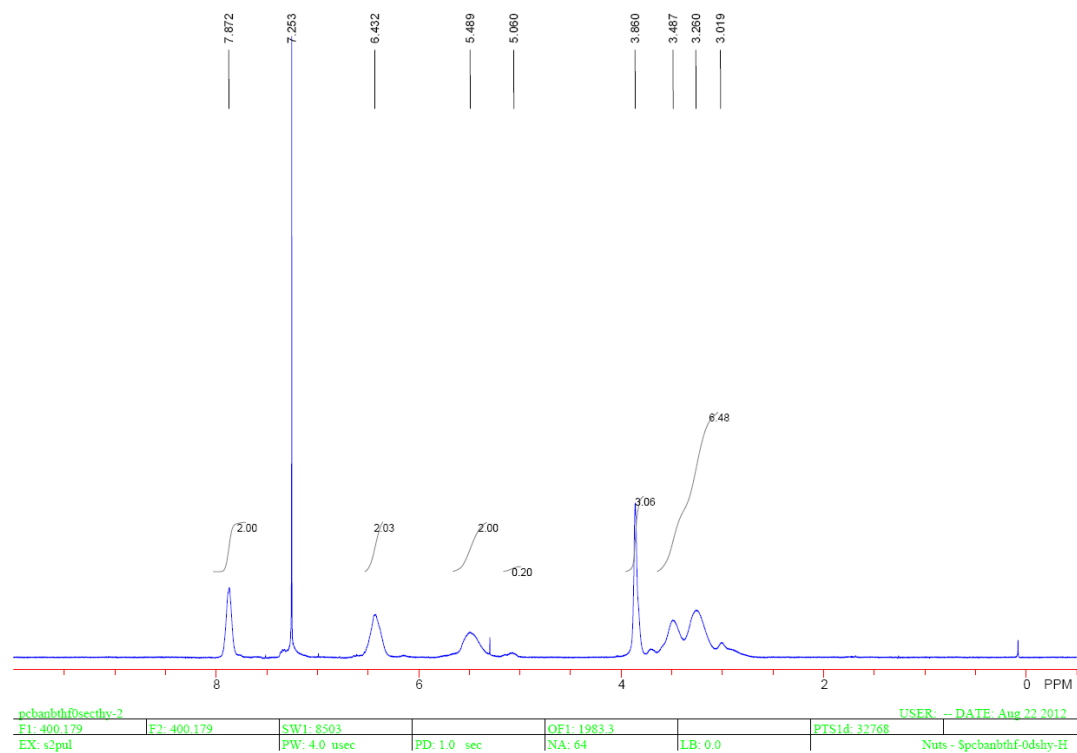

(b)

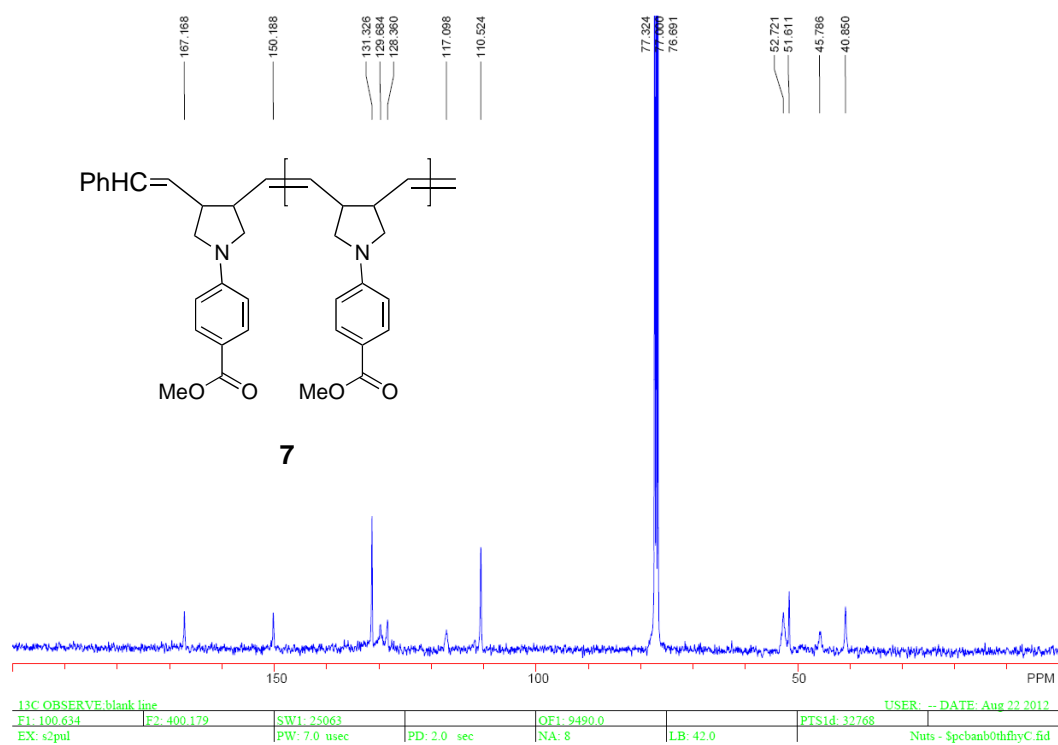

**Figure S6:** (a) <sup>1</sup>H (400 MHz) and (b) <sup>13</sup>C (100 MHz) NMR spectra of **7**.



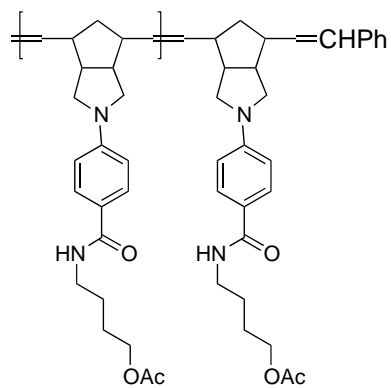

**19**

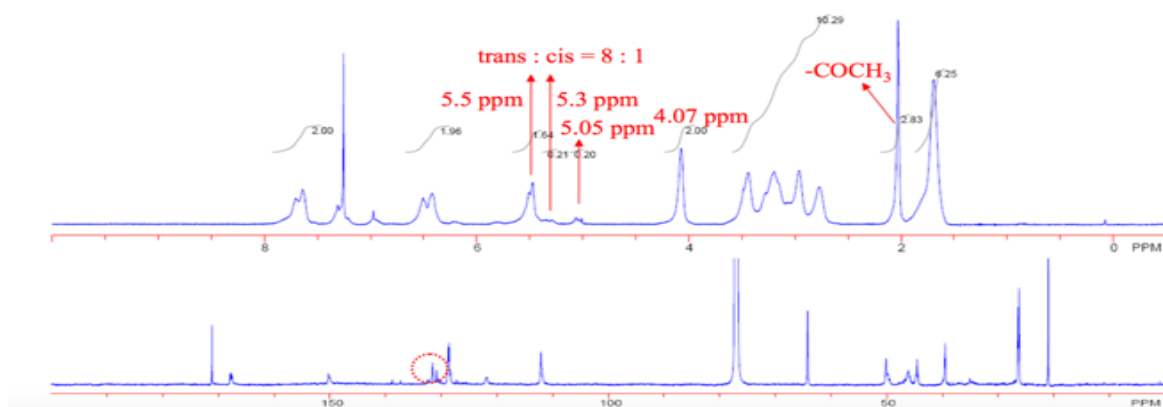

**Figure S7:** (a)  $^1\text{H}$  (400 MHz) and (b)  $^{13}\text{C}$  (100 MHz) NMR spectra of **19**.

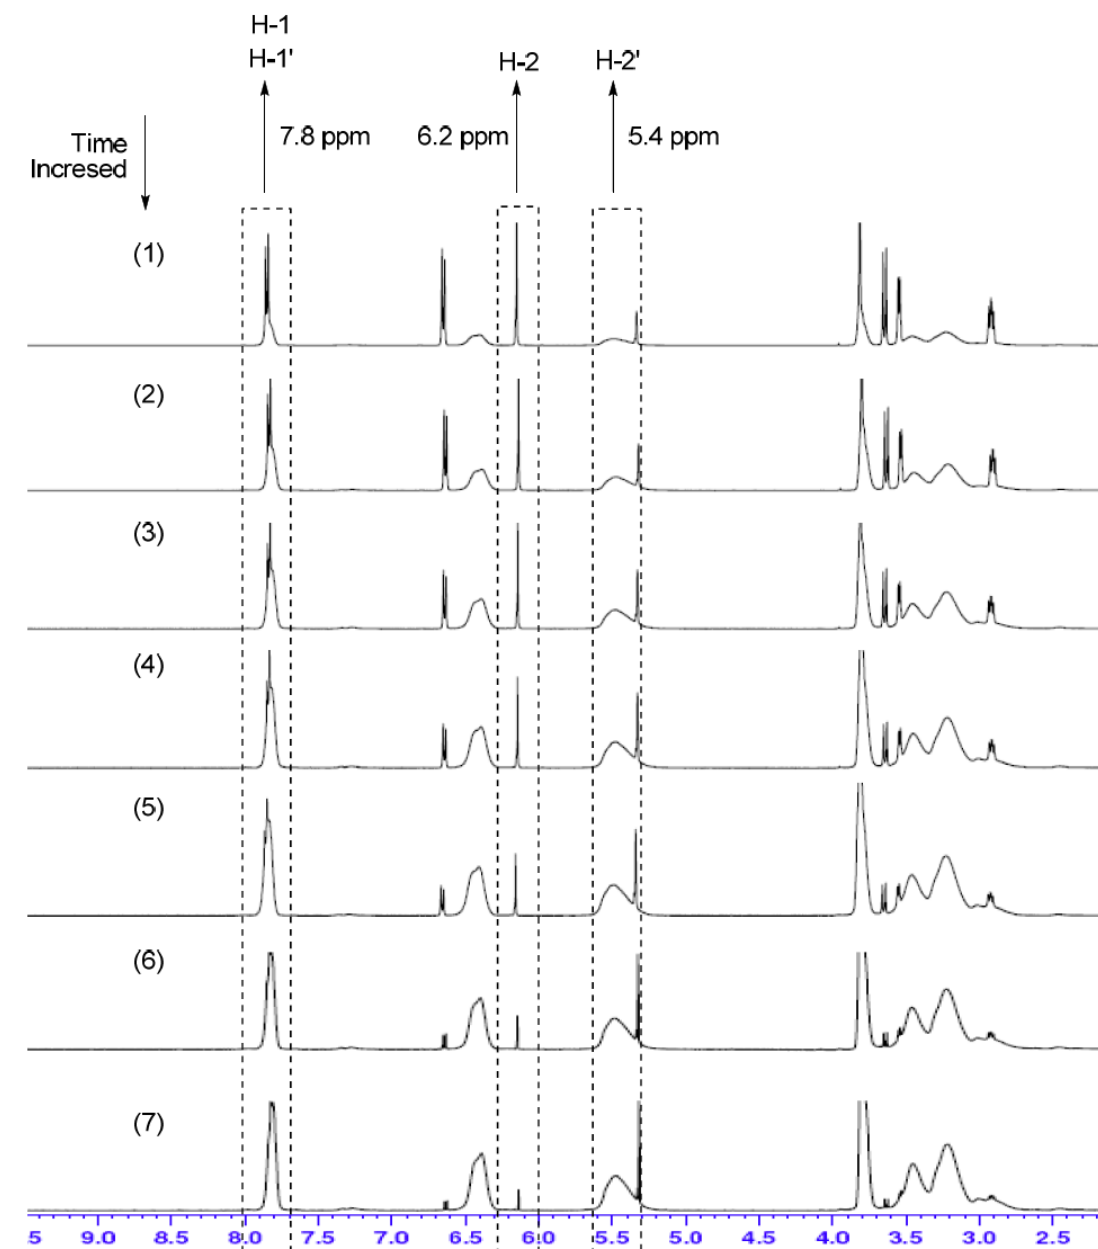

S9

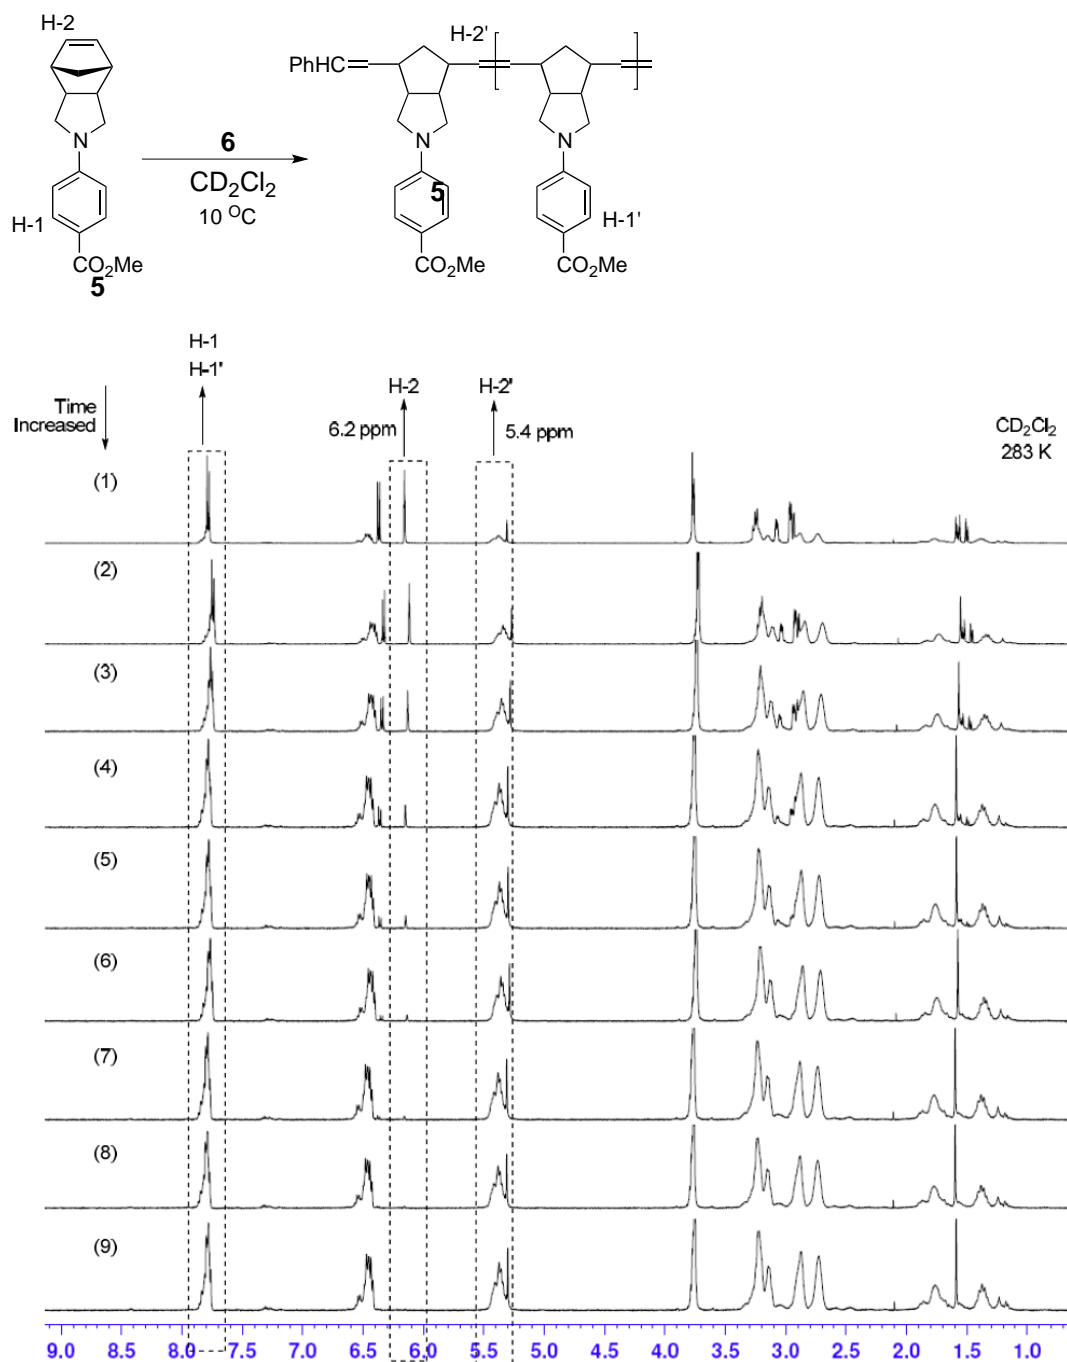

**Figure S9:** Kinetics of the **6**-catalyzed reaction of **5** in  $\text{CD}_2\text{Cl}_2$  at  $10^\circ\text{C}$ . The reaction was monitored by the decrease of the peak intensity for H-2 using the peaks for H-1 and H-1' as the internal reference. The spectra were recorded every ten minutes.

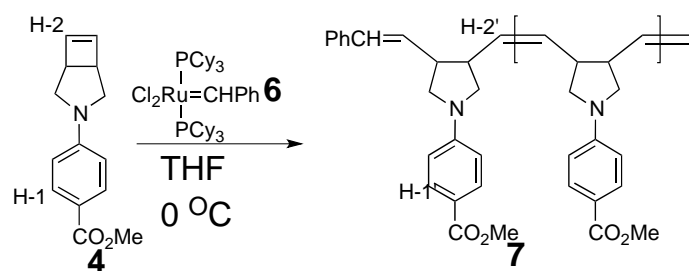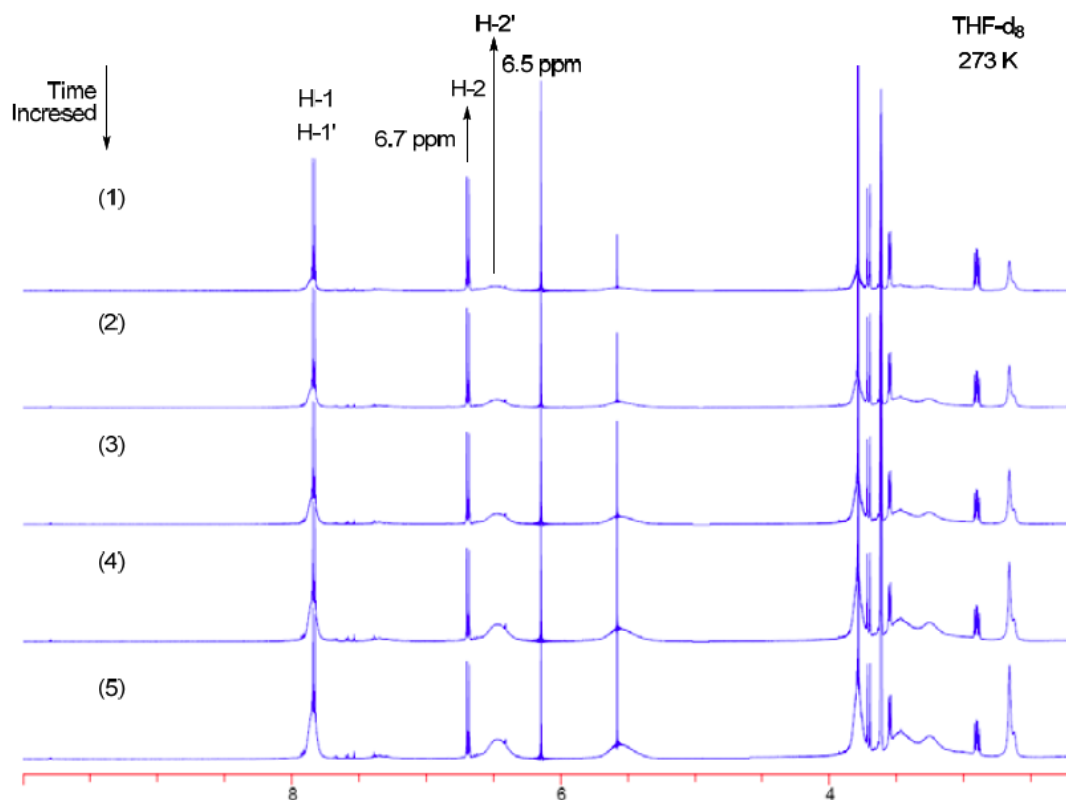

**Figure S10:** Kinetics of the **6**-catalyzed reaction of **4** in THF at 0 °C. The reaction was monitored by the decrease of the peak intensity for H-2 using the peaks for H-1 and H-1' as the internal reference. The spectra were recorded every twenty minutes.
